# Supplementary material
Source: PubMed Central journal article supplement (PMC5557413)
Supplement: NIHMS860818-supplement-8.pdf [file NIHMS860818-supplement-8.pdf]

**Table S1. Statistics for crystallography data collection and refinement, Related to Figure 1 and 3.**

|                                                     | D57A                      | Q20A                       |
|-----------------------------------------------------|---------------------------|----------------------------|
| <b>Data Collection <sup>a</sup></b>                 |                           |                            |
| Space group                                         | <i>P</i> 2 <sub>1</sub>   | <i>C</i> 222 <sub>1</sub>  |
| Cell dimensions (Å)                                 |                           |                            |
| <i>a</i> , <i>b</i> , <i>c</i> (Å)                  | 47.02, 36.9, 47.51        | 63.71, 189, 90.86          |
| <i>α</i> , <i>β</i> , <i>γ</i> (°)                  | 90, 104.27, 90            | 90, 90, 90                 |
| Wavelength (Å)                                      | 1.03327                   | 1.03327                    |
| Resolution (Å)                                      | 50.00-2.80<br>(2.85-2.80) | 29.76-2.78<br>(2.93-2.78)  |
| R <sub>merge</sub> (%)                              | 25.9 (>1)                 | 15.8 (>1)                  |
| <i>I</i> / <i>σ</i> ( <i>I</i> )                    | 13.73 (1.33)              | 11.39 (0.92)               |
| Completeness (%)                                    | 96.9 (73.7)               | 98 (87.3)                  |
| Redundancy                                          | 9.3 (2.3)                 | 6.3 (3.9)                  |
| <b>Refinement</b>                                   |                           |                            |
| Resolution                                          | 29.01-2.79<br>(2.89-2.79) | 29.76-2.78 (2.88-<br>2.78) |
| Unique reflections                                  | 3928 (289)                | 13933 (1130)               |
| <i>R</i> <sub>work</sub> / <i>R</i> <sub>free</sub> | 0.242/0.269               | 0.227/0.267                |
| Number of atoms                                     |                           |                            |
| Protein                                             | 1326                      | 2729                       |
| Ligands/PEG                                         | 41                        |                            |
| B-factors (Å <sup>2</sup> )                         |                           |                            |
| Protein                                             | 56.38                     | 86.4                       |
| Ligands/PEG                                         | 59.95                     |                            |
| R.m.s deviations                                    |                           |                            |
| Bond lengths (Å)                                    | 0.005                     | 0.005                      |
| Bond angles (°)                                     | 0.88                      | 1.20                       |

<sup>a</sup> High-resolution shell is shown in parentheses.

**Table S2. Table of simulations performed, Related to Figure 2, 3, 4, 6 and 7.**

| Initial structure                             | Substrate | Simulation size                                                                                               | Simulation No. | Duration ( $\mu$ s) | Final conformational state                                              |
|-----------------------------------------------|-----------|---------------------------------------------------------------------------------------------------------------|----------------|---------------------|-------------------------------------------------------------------------|
| Outward open (WT)<br>LbSemiSWEET              | Glucose   | 64 Å × 64 Å × 75 Å<br>113 lipids<br>9 Na <sup>+</sup> ; 13 Cl <sup>-</sup><br>~4,900 waters<br>~32,800 atoms  | 1              | 2.18                | Outward open; glucose dissociates (1.78 $\mu$ s)                        |
|                                               |           |                                                                                                               | 2              | 1.84                | Outward open                                                            |
|                                               |           |                                                                                                               | 3              | 0.82                | Outward open; glucose dissociates (0.34 $\mu$ s)                        |
|                                               |           |                                                                                                               | 4              | 5.39                | Inward open                                                             |
|                                               |           |                                                                                                               | 5              | 0.29                | Outward open; glucose dissociates (0.28 $\mu$ s)                        |
|                                               |           |                                                                                                               | 6              | 2.69                | Outward open                                                            |
|                                               |           |                                                                                                               | 7              | 2.39                | Outward open                                                            |
|                                               |           |                                                                                                               | 8              | 2.95                | Outward open                                                            |
|                                               |           |                                                                                                               | 9              | 5.88                | Inward open; glucose unbinds (1.80 $\mu$ s)                             |
|                                               |           |                                                                                                               | 10             | 1.95                | Outward open                                                            |
| Outward open (WT)<br>LbSemiSWEET<br>(Round 2) | Glucose   | 65 Å × 67 Å × 77 Å<br>127 lipids<br>11 Na <sup>+</sup> ; 15 Cl <sup>-</sup><br>~5,400 waters<br>~35,900 atoms | 11             | 3.02                | Occluded                                                                |
|                                               |           |                                                                                                               | 12             | 3.02                | Outward open; glucose dissociates (1.50 $\mu$ s)                        |
|                                               |           |                                                                                                               | 13             | 3.04                | Outward open                                                            |
|                                               |           |                                                                                                               | 14             | 3.05                | Outward open                                                            |
|                                               |           |                                                                                                               | 15             | 6.02                | Inward open                                                             |
|                                               |           |                                                                                                               | 16             | 5.02                | Inward open                                                             |
|                                               |           |                                                                                                               | 17             | 5.04                | Occluded                                                                |
|                                               |           |                                                                                                               | 18             | 5.02                | Outward open; glucose dissociates, rebinds (1.60 $\mu$ s, 4.30 $\mu$ s) |
|                                               |           |                                                                                                               | 19             | 5.06                | Outward open; glucose dissociates (3.00 $\mu$ s)                        |
|                                               |           |                                                                                                               | 20             | 5.03                | Occluded                                                                |
| Outward open (WT)<br>LbSemiSWEET              | None      | 64 Å × 64 Å × 75 Å<br>113 lipids<br>9 Na <sup>+</sup> ; 13 Cl <sup>-</sup><br>~4,900 waters<br>~32,800 atoms  | 21             | 2.23                | Outward open                                                            |
|                                               |           |                                                                                                               | 22             | 2.18                | Inward open                                                             |
|                                               |           |                                                                                                               | 23             | 1.89                | Outward open                                                            |
|                                               |           |                                                                                                               | 24             | 2.57                | Outward open                                                            |
|                                               |           |                                                                                                               | 25             | 2.35                | Outward open                                                            |
|                                               |           |                                                                                                               | 26             | 2.56                | Outward open                                                            |
|                                               |           |                                                                                                               | 27             | 2.51                | Outward open                                                            |
|                                               |           |                                                                                                               | 28             | 2.86                | Outward open                                                            |
|                                               |           |                                                                                                               | 29             | 2.86                | Outward open                                                            |
|                                               |           |                                                                                                               | 30             | 2.37                | Inward open                                                             |
| Outward open (WT)<br>LbSemiSWEET<br>(Round 2) | None      | 65 Å × 67 Å × 77 Å<br>127 lipids<br>11 Na <sup>+</sup> ; 15 Cl <sup>-</sup><br>~5,400 waters<br>~35,900 atoms | 31             | 3.02                | Outward open                                                            |
|                                               |           |                                                                                                               | 32             | 3.03                | Outward open                                                            |
|                                               |           |                                                                                                               | 33             | 3.03                | Inward open                                                             |
|                                               |           |                                                                                                               | 34             | 3.04                | Outward open                                                            |
|                                               |           |                                                                                                               | 35             | 5.02                | Inward open                                                             |
|                                               |           |                                                                                                               | 36             | 3.05                | Outward open                                                            |
|                                               |           |                                                                                                               | 37             | 3.04                | Outward open                                                            |

|                                  |         |                                                              |    |      |              |
|----------------------------------|---------|--------------------------------------------------------------|----|------|--------------|
|                                  |         |                                                              | 38 | 3.04 | Outward open |
|                                  |         |                                                              | 39 | 3.03 | Outward open |
|                                  |         |                                                              | 40 | 4.17 | Outward open |
| Occluded                         | Glucose | $63 \text{ \AA} \times 62 \text{ \AA} \times 79 \text{ \AA}$ | 41 | 1.49 | Occluded     |
| LbSemiSWEET                      |         | 113 lipids                                                   | 42 | 1.48 | Occluded     |
| PDBID: 4QNC                      |         | 9 Na <sup>+</sup> ; 13 Cl <sup>-</sup>                       | 43 | 1.46 | Occluded     |
|                                  |         | ~4,800 waters                                                | 44 | 1.28 | Inward open  |
|                                  |         | ~32,400 atoms                                                | 45 | 1.14 | Inward open  |
|                                  |         |                                                              | 46 | 0.63 | Occluded     |
|                                  |         |                                                              | 47 | 0.69 | Inward open  |
| Occluded                         | None    | $63 \text{ \AA} \times 62 \text{ \AA} \times 79 \text{ \AA}$ | 48 | 1.32 | Inward open  |
| LbSemiSWEET                      |         | 113 lipids                                                   | 49 | 1.12 | Occluded     |
| PDBID: 4QNC                      |         | 9 Na <sup>+</sup> ; 13 Cl <sup>-</sup>                       | 50 | 1.15 | Inward open  |
|                                  |         | ~4,800 waters                                                | 51 | 0.95 | Inward open  |
|                                  |         | ~32,400 atoms                                                | 52 | 0.95 | Occluded     |
|                                  |         |                                                              | 53 | 0.65 | Inward open  |
|                                  |         |                                                              | 54 | 0.62 | Inward open  |
| Inward open                      | None    | $65 \text{ \AA} \times 60 \text{ \AA} \times 95 \text{ \AA}$ | 55 | 2.43 | Inward open  |
| EcSemiSWEET                      |         | 111 lipids                                                   | 56 | 2.22 | Inward open  |
| PDBID: 4X5M                      |         | 12 Na <sup>+</sup> ; 20 Cl <sup>-</sup>                      | 57 | 2.22 | Inward open  |
|                                  |         | ~7,400 waters                                                |    |      |              |
|                                  |         | ~40,000 atoms                                                |    |      |              |
| Outward open (D57A)              | Glucose | $65 \text{ \AA} \times 67 \text{ \AA} \times 77 \text{ \AA}$ | 58 | 3.04 | Inward open  |
| LbSemiSWEET (Round 2)            |         | 127 lipids                                                   | 59 | 3.03 | Outward open |
|                                  |         | 11 Na <sup>+</sup> ; 15 Cl <sup>-</sup>                      | 60 | 3.03 | Occluded     |
|                                  |         | ~5,400 waters                                                | 61 | 3.02 | Outward open |
|                                  |         | ~35,900 atoms                                                | 62 | 3.04 | Outward open |
| Outward open (I60A)              | Glucose | $65 \text{ \AA} \times 67 \text{ \AA} \times 77 \text{ \AA}$ | 63 | 3.01 | Outward open |
| LbSemiSWEET (Round 2)            |         | 127 lipids                                                   | 64 | 3.05 | Outward open |
|                                  |         | 11 Na <sup>+</sup> ; 15 Cl <sup>-</sup>                      | 65 | 3.04 | Outward open |
|                                  |         | ~5,400 waters                                                | 66 | 3.02 | Outward open |
|                                  |         | ~35,900 atoms                                                | 67 | 3.02 | Outward open |
| Outward open TM1 alone (Round 2) | None    | $55 \text{ \AA} \times 55 \text{ \AA} \times 75 \text{ \AA}$ | 68 | 1.02 | N.A.         |
|                                  |         | 99 lipids                                                    | 69 | 1.03 | N.A.         |
|                                  |         | 8 Na <sup>+</sup> ; 9 Cl <sup>-</sup>                        | 70 | 1.03 | N.A.         |
|                                  |         | ~3,400 waters                                                |    |      |              |
|                                  |         | ~24,000 atoms                                                |    |      |              |
